# Supplementary material for: Long-term prognostic value of computed tomography-based attenuation correction on thallium-201 myocardial perfusion imaging: A cohort study
Source: PubMed Central journal article supplement (PMC8547642; doi:10.1371/journal.pone.0258983), 2021-10-26
Supplement: pone.0258983.s001.pdf [file pone.0258983.s001.pdf]

**S1 Fig.** Kaplan-Meier (KM) analysis for all-cause mortality by SRS 0-3, 4-8, 9-13 and > 13 in AC (A) and NAC (B) images, respectively.

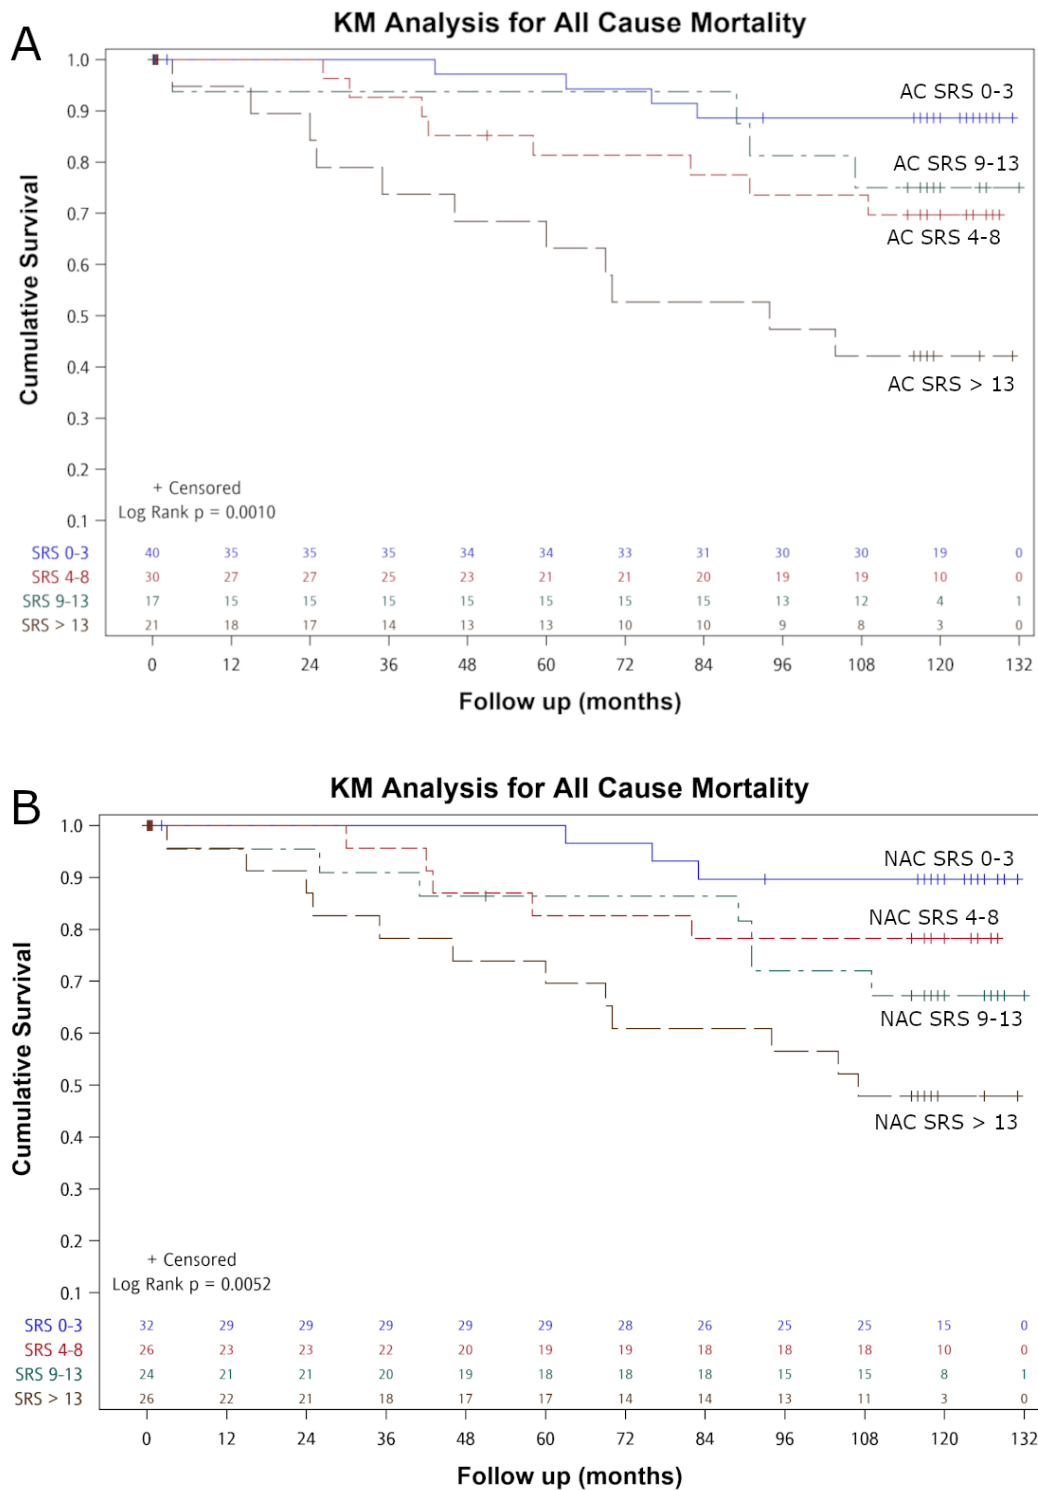

AC: attenuation correction; NAC: non-attenuation correction; SRS: summed stress score
