# Supplementary material for: Long-term prognostic value of computed tomography-based attenuation correction on thallium-201 myocardial perfusion imaging: A cohort study
Source: PubMed Central journal article supplement (PMC8547642; doi:10.1371/journal.pone.0258983), 2021-10-26
Supplement: pone.0258983.s002.pdf [file pone.0258983.s002.pdf]

**S2 Fig.** Kaplan-Meier (KM) analysis for all cause mortality and composites of mortality and cardiovascular (CV)-related re-admission in subgroups of obesity and non-obesity subgroups.

- Obesity subgroup

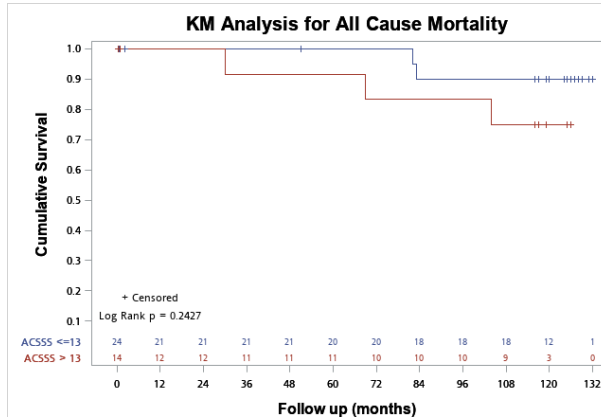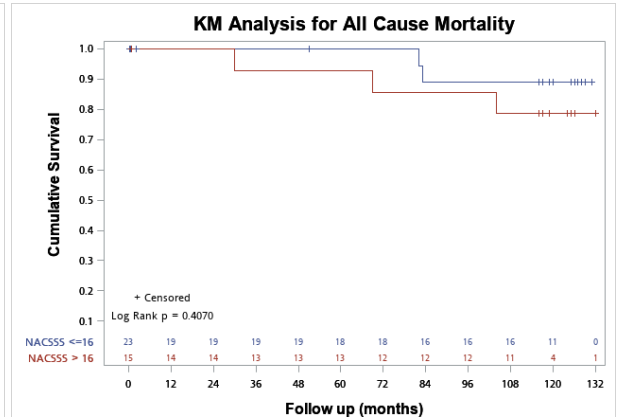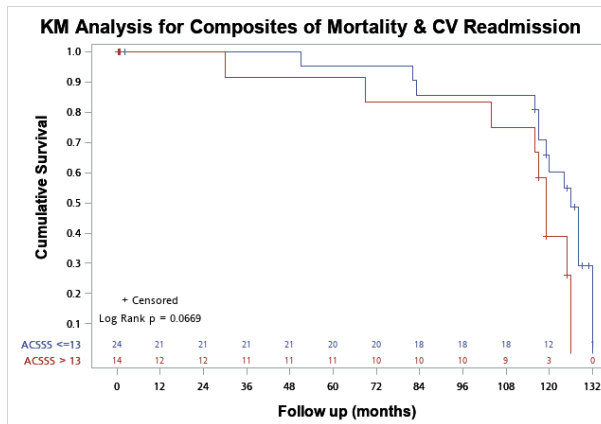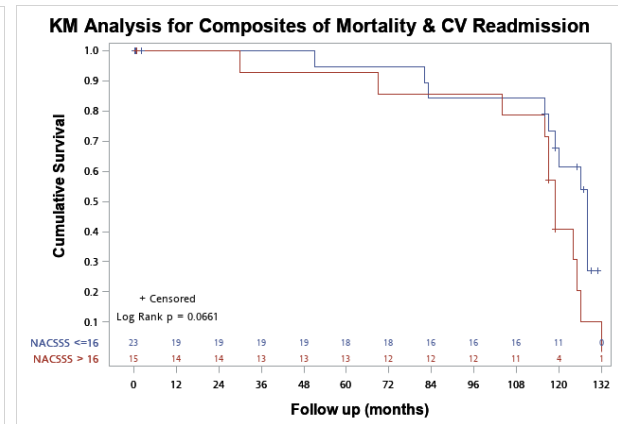

- Non-obesity subgroup

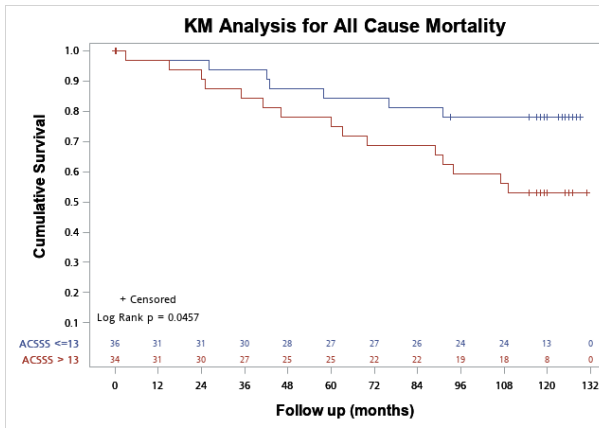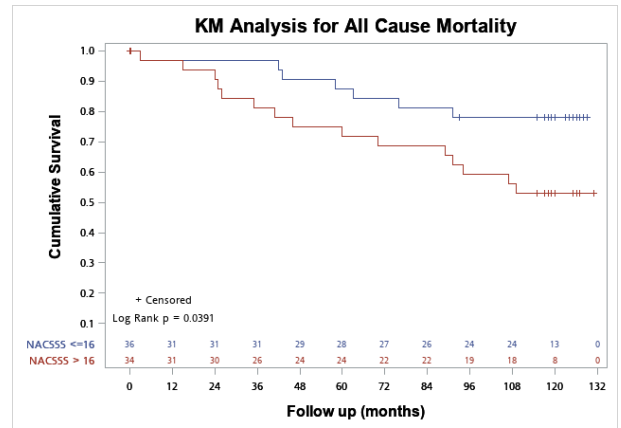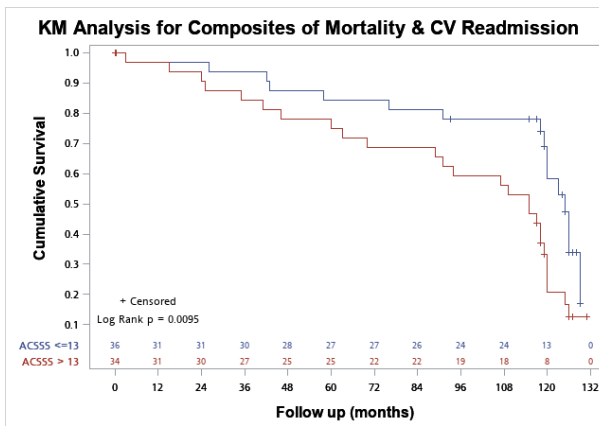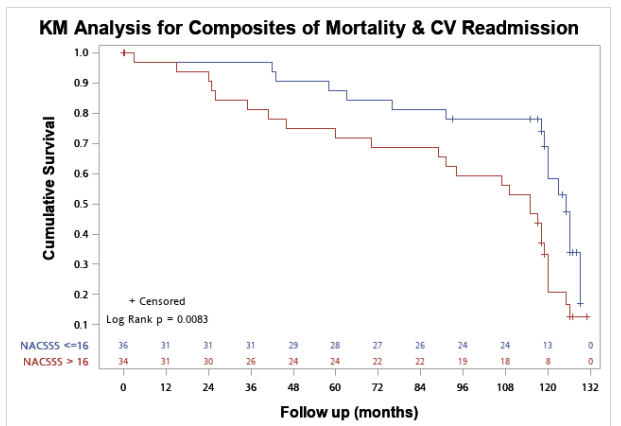

AC: attenuation correction; NAC: non-attenuation correction; SSS: summed stress score
