# Supplementary material for: Long-term prognostic value of computed tomography-based attenuation correction on thallium-201 myocardial perfusion imaging: A cohort study
Source: PubMed Central journal article supplement (PMC8547642; doi:10.1371/journal.pone.0258983), 2021-10-26
Supplement: pone.0258983.s004.pdf [file pone.0258983.s004.pdf]

**S1 Table.** Mortality rate by SSS, SRS and SDS groups in AC and NAC images

| <b>SCORE GROUPS</b> | <b>N</b> | <b>PERSON-TIME</b> | <b>MORTALITY</b> | <b>MORTALITY RATE (%)<br/>(N/PERSON-TIME)</b> |       |
|---------------------|----------|--------------------|------------------|-----------------------------------------------|-------|
| AC SSS              | 0-3      | 12                 | 1120.37          | 1                                             | 0.09% |
|                     | 4-8      | 31                 | 2967.34          | 4                                             | 0.13% |
|                     | 9-13     | 17                 | 1711.47          | 4                                             | 0.23% |
|                     | >13      | 48                 | 4210.7           | 18                                            | 0.43% |
| NAC SSS             | 0-3      | 7                  | 697.30           | 0                                             | 0.00% |
|                     | 4-8      | 23                 | 2044.41          | 3                                             | 0.15% |
|                     | 9-13     | 15                 | 1416.47          | 2                                             | 0.14% |
|                     | >13      | 63                 | 5851.7           | 22                                            | 0.38% |
| AC SRS              | 0-3      | 40                 | 4035.11          | 4                                             | 0.10% |
|                     | 4-8      | 30                 | 2720.47          | 8                                             | 0.29% |
|                     | 9-13     | 17                 | 1736.40          | 4                                             | 0.23% |
|                     | >13      | 21                 | 1517.90          | 11                                            | 0.72% |
| NAC SRS             | 0-3      | 32                 | 3378.77          | 3                                             | 0.09% |
|                     | 4-8      | 26                 | 2438.94          | 5                                             | 0.21% |
|                     | 9-13     | 24                 | 2215.87          | 7                                             | 0.32% |
|                     | >13      | 26                 | 1976.30          | 12                                            | 0.61% |
| AC SDS              | 0-1      | 21                 | 1591.80          | 5                                             | 0.31% |
|                     | 2-4      | 29                 | 2648.14          | 5                                             | 0.19% |
|                     | 5-8      | 29                 | 2884.54          | 8                                             | 0.28% |
|                     | >8       | 29                 | 2885.40          | 9                                             | 0.31% |
| NAC SDS             | 0-1      | 15                 | 932.80           | 4                                             | 0.43% |
|                     | 2-4      | 23                 | 1909.41          | 5                                             | 0.26% |
|                     | 5-8      | 34                 | 3469.60          | 7                                             | 0.20% |
|                     | >8       | 36                 | 3698.07          | 11                                            | 0.30% |

AC: attenuation correction; NAC: non-attenuation correction; SDS: summed difference score; SRS: summed rest score; SSS: summed stress score
