# Supplementary material for: Long-term prognostic value of computed tomography-based attenuation correction on thallium-201 myocardial perfusion imaging: A cohort study
Source: PubMed Central journal article supplement (PMC8547642; doi:10.1371/journal.pone.0258983), 2021-10-26
Supplement: pone.0258983.s005.pdf [file pone.0258983.s005.pdf]

**S2 Table.** Multivariable analysis for composites of mortality and cardiovascular (CV)-related re-admission and CV-related re-admission with SDS. AC SDS and NAC SDS were analyzed in two separate models due to significant correlation between AC SDS and NAC SDS.

|                                                   | <b>Composite of Mortality &amp; CV Re-admission</b> |         | <b>CV Re-admission</b> |         |
|---------------------------------------------------|-----------------------------------------------------|---------|------------------------|---------|
|                                                   | HR                                                  | P value | HR                     | P value |
| <b>Clinical data + Attenuation correction</b>     |                                                     |         |                        |         |
| <b>Gender</b>                                     | 0.90                                                | 0.71    | 0.84                   | 0.63    |
| <b>Age</b>                                        | 1.03                                                | 0.11    | 1.01                   | 0.53    |
| <b>BMI</b>                                        | NA                                                  | NA      | NA                     | NA      |
| <b>FRS(%)</b>                                     | 1.01                                                | 0.54    | NA                     | NA      |
| <b>LVEF</b>                                       | NA                                                  | NA      | NA                     | NA      |
| <b>AC SDS</b>                                     | 1.08                                                | 0.006   | 1.11                   | 0.002   |
| <b>Clinical data + Non-attenuation correction</b> |                                                     |         |                        |         |
| <b>Gender</b>                                     | 0.74                                                | 0.91    | 0.86                   | 0.68    |
| <b>Age</b>                                        | 1.03                                                | 0.06    | 1.02                   | 0.31    |
| <b>BMI</b>                                        | NA                                                  | NA      | NA                     | NA      |
| <b>FRS(%)</b>                                     | 1.01                                                | 0.52    | NA                     | NA      |
| <b>LVEF</b>                                       | NA                                                  | NA      | NA                     | NA      |
| <b>NAC SDS</b>                                    | 1.07                                                | 0.012   | 1.10                   | 0.002   |
| <b>Clinical data + Attenuation correction</b>     |                                                     |         |                        |         |
| <b>Gender</b>                                     | 0.88                                                | 0.66    | 0.84                   | 0.63    |
| <b>Age</b>                                        | 1.03                                                | 0.07    | 1.02                   | 0.35    |
| <b>BMI</b>                                        | NA                                                  | NA      | NA                     | NA      |
| <b>FRS(%)</b>                                     | 1.02                                                | 0.42    | NA                     | NA      |
| <b>LVEF</b>                                       | NA                                                  | NA      | NA                     | NA      |
| <b>AC SDS group</b>                               | 1.17                                                | 0.20    | 1.30                   | 0.10    |
| <b>Clinical data + Non-attenuation correction</b> |                                                     |         |                        |         |
| <b>Gender</b>                                     | 0.85                                                | 0.58    | 0.79                   | 0.51    |
| <b>Age</b>                                        | 1.03                                                | 0.054   | 1.02                   | 0.27    |
| <b>BMI</b>                                        | NA                                                  | NA      | NA                     | NA      |
| <b>FRS(%)</b>                                     | 1.02                                                | 0.42    | NA                     | NA      |
| <b>LVEF</b>                                       | NA                                                  | NA      | NA                     | NA      |
| <b>NAC SDS group</b>                              | 1.18                                                | 0.19    | 1.36                   | 0.07    |

\* SDS group: classifying the severity of MPI by SDS 0-1, 2-4, 5-8, >8

\*\* AC: attenuation correction; BMI: body mass index; FRS: Framingham risk score;

gr: group; LVEF: left ventricular ejection fraction; NAC: non-attenuation correction;

SDS: summed difference score
