# Supplementary material for: Long-term prognostic value of computed tomography-based attenuation correction on thallium-201 myocardial perfusion imaging: A cohort study
Source: PLOS journal article supplement (doi:10.1371/journal.pone.0258983), 2021-10-26
Supplement: S3 (10.1371/journal.pone.0258983.s003) [file journal.pone.0258983.s003]

**S3 Fig.** Kaplan-Meier (KM) analysis for all cause mortality and composites of mortality and cardiovascular (CV)-related re-admission in subgroups of discordant and concordant findings of AC and NAC.

- Discordant findings of AC and NAC

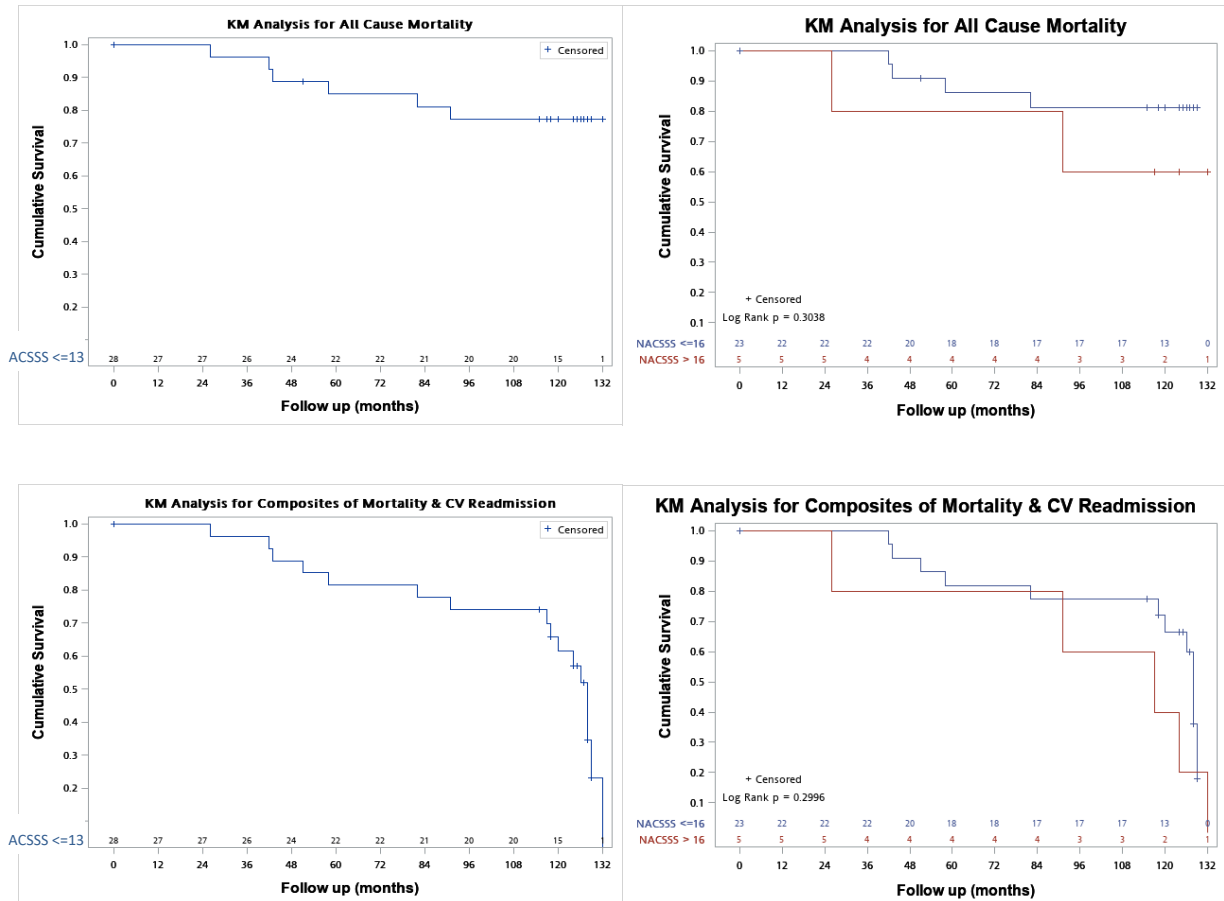

- Concordant findings of AC and NAC

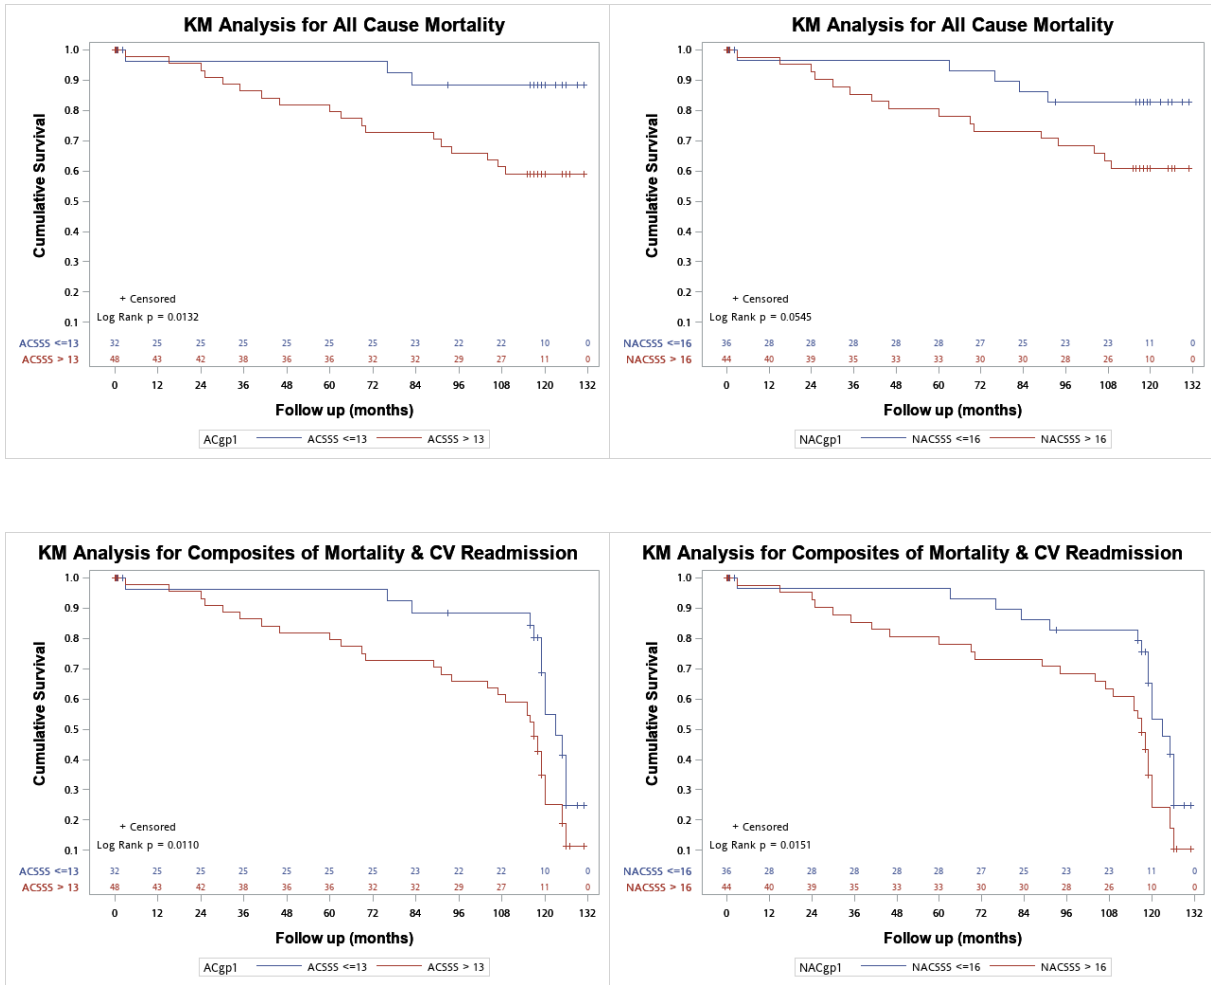

AC: attenuation correction; NAC: non-attenuation correction; SSS: summed stress score
